# Supplementary material for: Unprecedented formation of lactone derivatives in thiacalix[4]arene series
Source: Royal Society of Chemistry journal article supplement (doi:10.1039/b100906k), 2001-01-01
Supplement: b100906k.doc [file b100906k.doc]

Preparation of **5a**: *Method A)* To the solution of derivative **3a** (0.5 g, 5.97·10-4 mol) in 15 ml of carbon tetrachloride an oxalyl chloride (1.05 ml, 1.19·10-2 mol) was added and the reaction mixture was refluxed under stirring for 3 h. Solvent was than removed under a reduced pressure and the residue was dried on the vacuum of oil pump for 1 h. Dry chloride **4a** was dissolved in 10 ml of absolute THF and resulting solution was added dropwise to a mixture of absolute THF (20 ml) and dry Et3N (3.82·10-3 mol). The mixture was stirred 1 h at room temperature and THF was removed under a reduced pressure. The solid residue was partitioned between chloroform and 1 M hydrochloric acid and organic layer was dried over anhydrous magnesium sulphate. The residue after evaporation of solvent was precipitated from CHCl3:MeOH mixture to give 330 mg (69% yield) of desired product **5a** as a white powder, m. p.: 350 oC (ethyl acetate). 1H NMR (CDCl3, 300 MHz) : 7.83 (d, 2H, J=2.75 Hz, H-arom), 7.69 (d, 2H, J=2.74 Hz, H-arom), 7.03 (d, 2H, J=2.2 Hz, H-arom), 6.69 (d, 2H, J=2.19 Hz, H-arom), 5.52 (d, 2H, J=11.54 Hz, OCHAHB), 4.63 (d, 2H, J=12.09 Hz, OCHAHB), 1.40 (s, 18H, But**),** 0.88 (s, 18H, But**)**; 13C NMR (CDCl3) : 166.32, 153.23, 151.04, 150.18, 148.64, 135.61, 132.96, 132.07, 131.90, 130.94, 129.82, 128.99, 128.01, 66.98, 34.86, 34.09, 31.31, 30.81; IR (CHCl3) max: 1772.9 cm-1; MS FAB for C44H48O6S4, calcd. 800.23, found 800 (M+); Anal. calcd. for C44H48O6S4·0.5CH3COOEt: C, 65.37; H, 6.20. Found: C, 65.47; H, 6.33.

*Method B):* The mixture of derivative **3a** (100 mg, 1.19·10-4 mol), P2O5 (85 mg, 5.95·10-4 mol) in 15 ml of dichloromethane was stirred overnight and the reaction mixture was quenched by adding of distilled water (10 ml). Organic layer was separated, washed with water, dried over MgSO4 and evaporated under a reduced pressure. The crude product was purified by preparative TLC on silica gel using a mixture CHCl3/petrolether = 2/1 as an eluent to yield **5a** (66 %) and **6a** (10 %).

**6a**: Yield: 10%, m. p. > 350 oC (ethyl acetate), 1H NMR (CDCl3, 300 MHz) : 7.66 (d, 2H, J=2.20 Hz, H-arom), 7.47 (d, 2H, J=2.20 Hz, H-arom), 7.40 (d, 2H, J=2.20 Hz, H-arom), 7.26 (d, 2H, J=2.20 Hz, H-arom), 4.07 (d, 2H, J=11.54 Hz, OCHAHB), 3.54 (d, 2H, J=11.54 Hz, OCHAHB), 1.37 (s, 18H, But**),** 1.18 (s, 18H, But**)**.

The synthesis of **5b** was accomplished using similar procedure (Method A) as for compound **5a**. Yield: 72 %, m.p.: 331-333 °C (CHCl3:MetOH); 1H NMR (CDCl3, 300 MHz) ppm): 7.72 (d, 4H, J=7.69 Hz, H-arom), 7.27 (t, 2H, J=7.69 Hz, H-arom), 6.97 (dd, 2H, J=1.65 Hz, J=7.69 Hz, H-arom), 6.55 (t, 2H, J=7.69 Hz, H-arom), 6.22 (d, 2H, J=7.14 Hz, H-arom), 5.28 (d, 2H, J=12.09 Hz, OCHAHB), 4.61 (d, 2H, J=12.09 Hz, OCHAHB); 13C NMR(CDCl3): 166.22, 154.89, 153.10, 137.68, 134.77, 134.22, 133.86, 131.84, 131.42, 130.10, 128.71, 126.39, 126.01, 66.94. IR (CHCl3) max: 1773.6 cm-1; MS FAB for C28H16O6S4, calcd. 575.98, found 577 (M+); Anal. calcd. for C28H16O6S4·0.5CH3OH: C, 57.75; H, 3.06. Found: C, 57.47; H, 2.99.

**intermolecular hydrogen bonding**

Compound **5b** (Lacton1.cif)

O(1) - H(11) 3.02 -x+2,y-1/2,-z+1/2+1

O(1) - H(61) 2.72 -x+2,y-1/2,-z+1/2+1

O(5) - H(351) 2.74 -x+2,-y+1,-z+1

O(5) - H(401) 2.89 -x+2,-y+1,-z+1

O(5) - H(261) 2.65 -x+2,-y+1,-z+1

O(5) - H(282) 3.00 -x+2,-y+1,-z+1

O(5) - H(281) 2.97 -x+2,-y+1,-z+1

O(5) - H(262) 2.66 -x+2,-y+1,-z+1

O(6) - H(471) 2.47 -x+1,y+1/2,-z+1/2

O(7) - H(341) 2.61 -x+1,y+1/2,-z+1/2

O(7) - H(411) 3.03 -x+1,y+1/2,-z+1/2

O(11) - H(71) 2.68 -x+2,-y+1,-z+1

O(11) - H(542) 2.86 -x+1,-y+1,-z+1

O(11) - H(561) 2.91 -x+1,-y+1,-z+1

O(11) - H(541) 2.62 -x+1,-y+1,-z+1

O(11) - H(562) 2.89 -x+1,-y+1,-z+1

O(12) - H(121) 2.65 x-1,y,z

O(12) - H(191) 2.55 -x+1,y+1/2,-z+1/2

O(12) - H(201) 3.16 -x+1,y+1/2,-z+1/2

intermolecular hydrogen bonding between two moleculas of lacton1 in the independent part

O(6) - H(301) 2.72 x,y,z

O(6) - H(401) 2.73 x,y,z

Compound **5a** (lacton2.cif)

O(3) - H(352) 2.60 x,-y+1/2,z+1/2

O(6) - H(431) 2.49 -x+1,y-1/2,-z-1/2

O(6) - H(391) 2.83 x,y-1,z

O(6) - H(401) 3.07 x,y-1,z

O(1) - H(442) 2.96 x,-y+1/2,z-1/2

O(5) - H(351) 3.20 -x+2,y+1/2,-z+1/2

O(5) - H(352) 3.12 -x+2,y+1/2,-z+1/2

O(5) - H(262) 2.94 -x+2,-y+1,-z
