# Supplementary material for: Unprecedented formation of lactone derivatives in thiacalix[4]arene series
Source: Royal Society of Chemistry journal article supplement (doi:10.1039/b100906k), 2001-01-01

**Fig. S3.** HPLC chromatogram of **5b** on (R,R)-Wheelk-O 1 column (Merck), conditions: 0.5 ml/min CH2Cl2:heptane mixture, gradient 20  50 % of CH2Cl2 within 20 min.


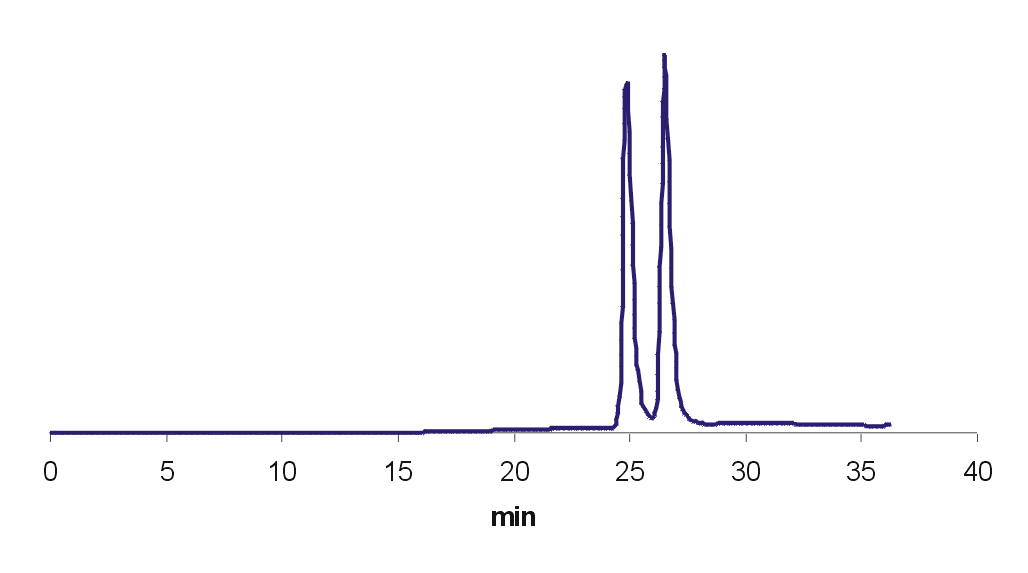

Supplement: b100906ks3.doc [file b100906ks3.doc]
