# Supplementary figures and images for: Unprecedented formation of lactone derivatives in thiacalix[4]arene series
Source: Royal Society of Chemistry journal article supplement (doi:10.1039/b100906k), 2001-01-01

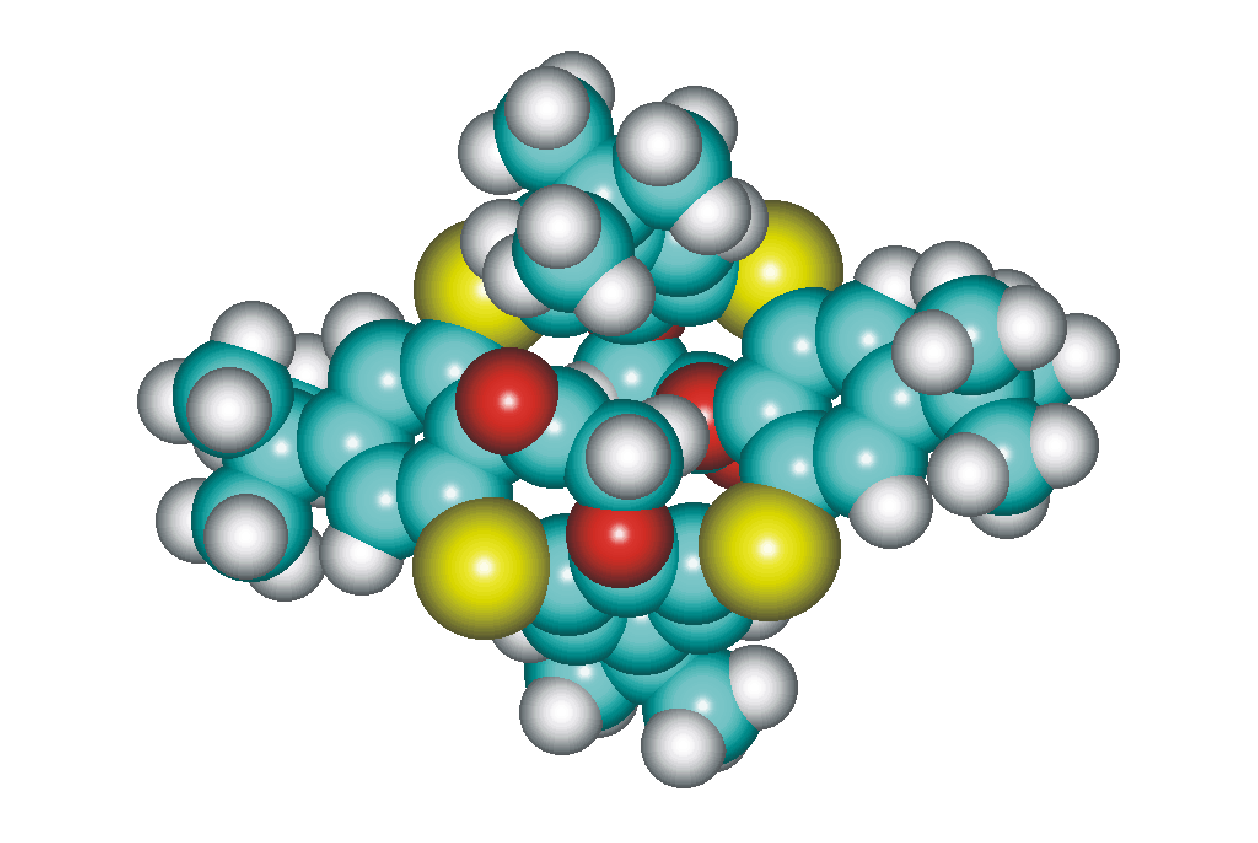


**Fig. S2.** Energy minimised structure of **6a** (AM1).

Supplement: b100906ks2.doc [file b100906ks2.doc]

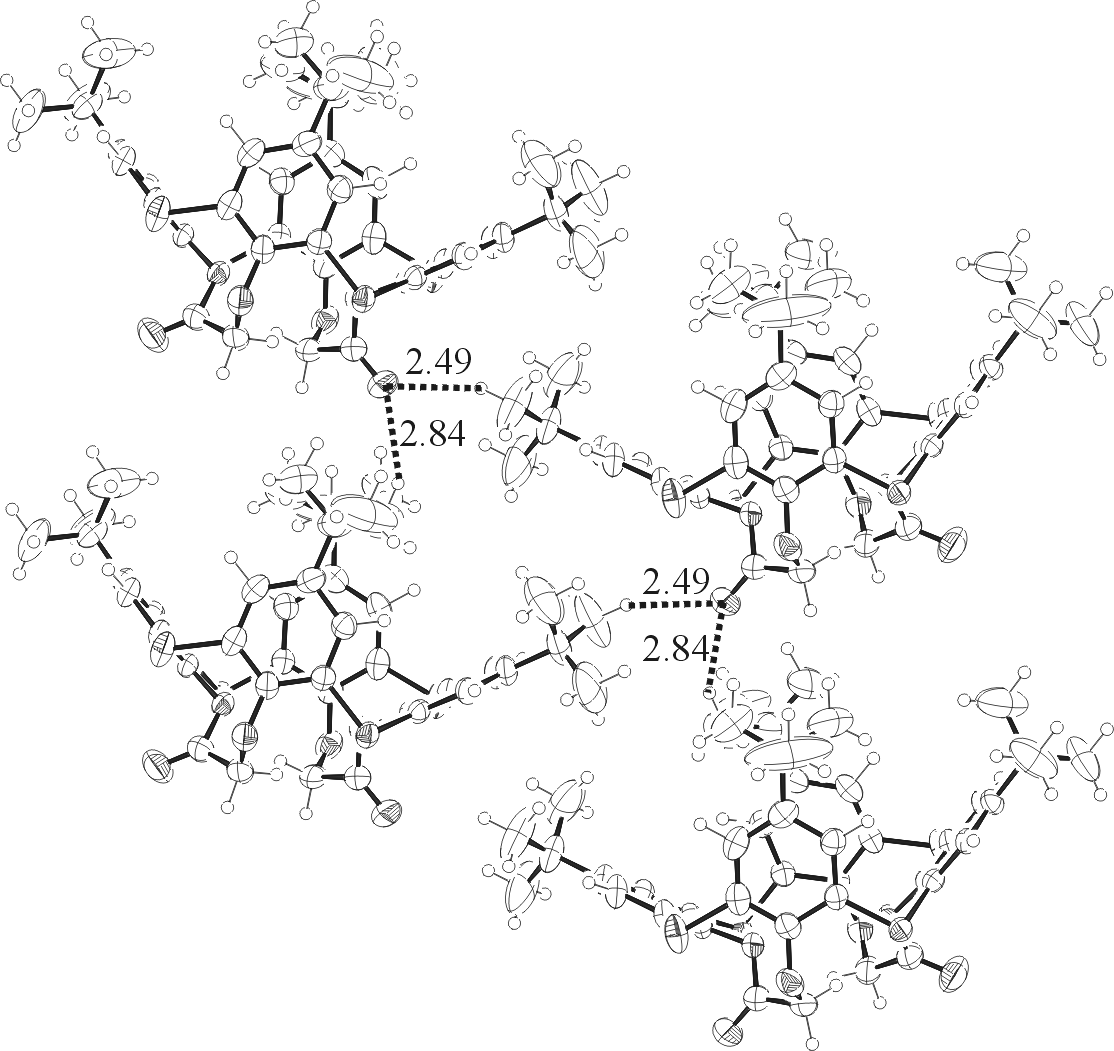


**Fig. S4.** Crystal packing of **5a** demonstrating intermolecular hydrogen bonding network.

Supplement: b100906ks4.doc [file b100906ks4.doc]
